# Supplementary material for: Potassium dependent structural changes in the selectivity filter of HERG potassium channels
Source: Springer Nature journal article supplement (doi:10.1038/s41467-024-51208-w), 2024-08-29
Supplement: MOESM3 [file 41467_2024_51208_MOESM3_ESM.pdf › 41467_2024_51208_MOESM3_ESM.pdf]

## **Description of Additional Supplementary Files**

**File Name:** Supplementary Movie 1

**Description:** Interactions between S620 and the selectivity filter during the transition between conducting and non-conducting structures

Movie showing how the S620 sidechain can interact with the backbone of G626 and F627 (H) or the backbone of Y616 (O) in the conductive state (Figure 4 D-G (i), main text). When the sidechain of r620 interacts with the backbone of Y616 (O) ((Figure 4 D-G (ii),(iii) main text), the V625 carbonyl oxygen can flip outward. The sidechain of S620 can then interact with the backbone of V625 (O) (Figure 4 C-F (iv), main text) in the inactivated state.
